# Supplementary material for: Long-Term Volumetric Change Estimation of Red Ash Quarry Sites in the Afro-Alpine Ecosystem of Bale Mountains National Park in Ethiopia
Source: MDPI journal article supplement (doi:10.3390/rs16071226), 2024-03-30
Supplement: s1 [file s1]

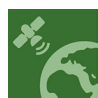

## Supplementary material

**Table S1.** Ground control points used as a check point and control point, Label, Easting, Northing, and Altitude for the processing of the year 1967 historical aerial photographs.

| Label       | Type          | Easting    | Northing  | Altitude |
|-------------|---------------|------------|-----------|----------|
| GCP_1967_1  | Check point   | 598368.55  | 754694.9  | 4029.97  |
| GCP_1967_2  | Check point   | 596816.12  | 749110.5  | 3846.81  |
| GCP_1967_3  | Control point | 596187.02  | 756801.6  | 4131.03  |
| GCP_1967_4  | Check point   | 594921.91  | 754878.4  | 4104.48  |
| GCP_1967_5  | Control point | 600347.06  | 749099.06 | 3705.05  |
| GCP_1967_6  | Control point | 593618.79  | 748721.17 | 3850.38  |
| GCP_1967_7  | Control point | 588322.145 | 756630.22 | 4104.03  |
| GCP_1967_8  | Control point | 588276.14  | 749332.23 | 3863.99  |
| GCP_1967_9  | Control point | 588731.69  | 752426.83 | 3979.02  |
| GCP_1967_10 | Control point | 591254.14  | 756597.32 | 4140.01  |
| GCP_1967_11 | Check point   | 592437.99  | 753451.42 | 4097.39  |
| GCP_1967_12 | Control point | 595409.14  | 752336.23 | 3996.01  |
| GCP_1967_13 | Check point   | 599079.5   | 756851.85 | 4078.31  |
| GCP_1967_14 | Control point | 599331.13  | 752997.22 | 3978.01  |
| GCP_1967_15 | Control point | 584805.15  | 756355.22 | 4102.07  |
| GCP_1967_16 | Check point   | 585022.91  | 748718.81 | 3811.54  |
| GCP_1967_17 | Control point | 587441.3   | 748612.29 | 3848.27  |
| GCP_1967_18 | Check point   | 603160.13  | 756946.22 | 3718.66  |
| GCP_1967_19 | Control point | 603436.13  | 749133.23 | 3548.28  |
| GCP_1967_20 | Check point   | 601703.42  | 754398.82 | 3821.53  |
| GCP_1967_21 | Check point   | 604684.33  | 754233.38 | 3257.49  |
| GCP_1967_22 | Check point   | 589444.14  | 749070.23 | 3864.74  |

**Table S2.** Ground control points used as a check point and control point, Label, Easting, Northing, and Altitude for the processing of the year 1984 historical aerial photographs.

| Label       | Type          | X/Easting | Y/Northing | Z/Altitude |
|-------------|---------------|-----------|------------|------------|
| GCP_1984_1  | Check point   | 598132.9  | 763068.9   | 3711.49    |
| GCP_1984_2  | Control point | 598370.33 | 754695.7   | 4025.92    |
| GCP_1984_3  | Control point | 601703.41 | 754398.6   | 3821.02    |
| GCP_1984_4  | Control point | 600347.06 | 749099.06  | 3704.95    |
| GCP_1984_5  | Control point | 593618.79 | 748721.2   | 3850.24    |
| GCP_1984_6  | Check point   | 590157.3  | 748199.8   | 3877.93    |
| GCP_1984_7  | Control point | 590476.5  | 744498.2   | 3217.96    |
| GCP_1984_8  | Control point | 587441.3  | 748612.29  | 3848       |
| GCP_1984_9  | Check point   | 596829.5  | 749114.56  | 3841.11    |
| GCP_1984_10 | Control point | 596187.4  | 756801.59  | 4130.98    |
| GCP_1984_11 | Control point | 584704.5  | 751605.23  | 3529.02    |

|             |               |            |            |         |
|-------------|---------------|------------|------------|---------|
| GCP_1984_12 | Check point   | 588711.75  | 752422.9   | 3985.95 |
| GCP_1984_13 | Check point   | 592418.5   | 753444.8   | 4114.76 |
| GCP_1984_14 | Control point | 595409.2   | 752336.23  | 3996.02 |
| GCP_1984_15 | Control point | 599078.13  | 756844.22  | 4078    |
| GCP_1984_16 | Check point   | 599332.55  | 753016.6   | 3988.96 |
| GCP_1984_17 | Control point | 604843.71  | 745305.629 | 3286.4  |
| GCP_1984_18 | Control point | 595308.77  | 762895.69  | 3958.54 |
| GCP_1984_19 | Check point   | 592464.27  | 762621.25  | 4014.84 |
| GCP_1984_20 | Control point | 590007.61  | 754371.54  | 4284.78 |
| GCP_1984_21 | Control point | 594916.38  | 754885.69  | 4094.39 |
| GCP_1984_22 | Check point   | 604684.72  | 754233.83  | 3257.38 |
| GCP_1984_23 | Control point | 603160.13  | 756946.29  | 3718.18 |
| GCP_1984_24 | Check point   | 585022.91  | 748718.81  | 3811.37 |
| GCP_1984_25 | Control point | 589444.14  | 749070.23  | 3867-23 |
| GCP_1984_26 | Check point   | 603436.128 | 749133.22  | 3548.42 |
| GCP_1984_27 | Control point | 604782.85  | 748797.72  | 3487.93 |
| GCP_1984_28 | Check point   | 584750.71  | 743716.64  | 3124.91 |
| GCP_1984_29 | Control point | 598636.13  | 744769.23  | 3649.47 |
| GCP_1984_30 | Check point   | 602556.13  | 745568.26  | 3214.61 |

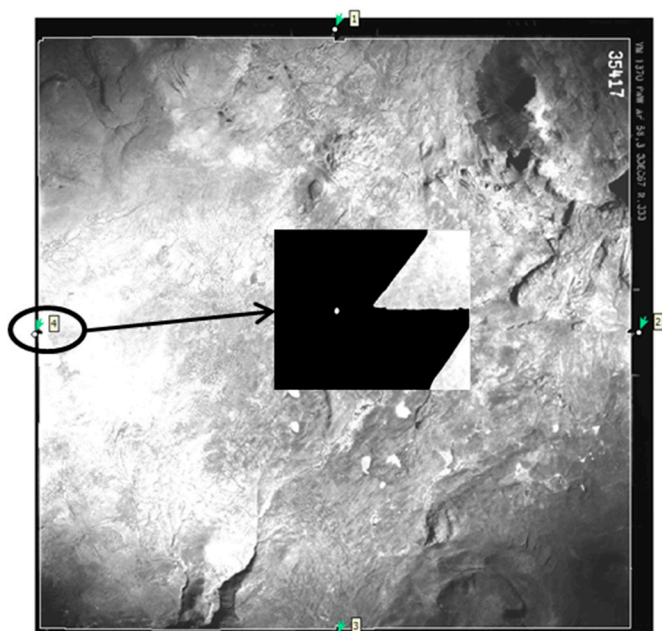

**Figure S1.** Fiducial mark type and it's orientation of KC-1(B) camera used to acquire the 1967 historical aerial photographs.

**Table S3.** Fiducial point coordinates of KC-1(B) camera used to acquire the 1967 historical aerial photographs, principal point, principal point symmetry, and principal point auto collimation (mm).

| Point                            | X        | Y        |
|----------------------------------|----------|----------|
| 1                                | 0.145    | 124.628  |
| 2                                | 124.786  | 0.096    |
| 3                                | 0.145    | -124.628 |
| 4                                | -124.628 | -0.096   |
| Principal point                  | 0.009    | 0.009    |
| Principal point symmetry         | 0.020    | 0.006    |
| Principal point auto collimation | 0.015    | 0.023    |

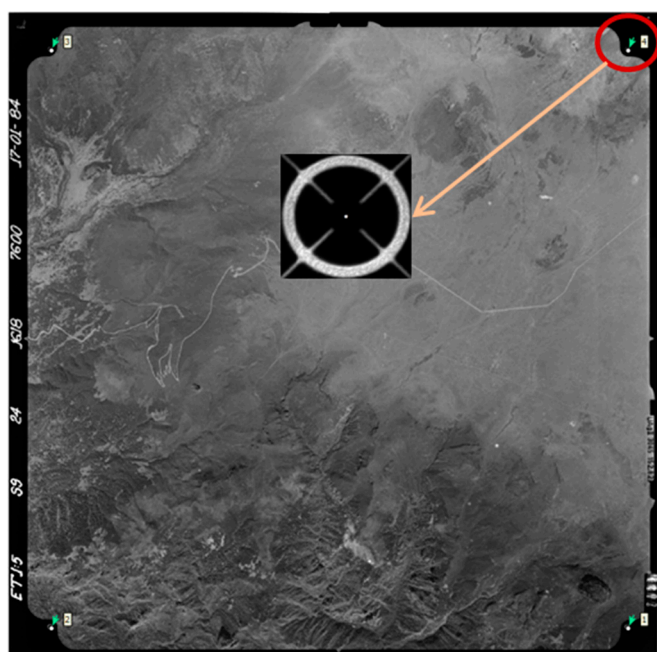

**Table S4.** Fiducial point coordinates of the Wild RC 10 camera used to acquire the 1984 historical aerial photographs, fiducial center, principal point symmetry, and principal point auto collimation (mm) (mm).

| Point                            | X        | Y        |
|----------------------------------|----------|----------|
| 1                                | +106.005 | -106.006 |
| 2                                | -106.001 | -105.997 |
| 3                                | -105.997 | +106.003 |
| 4                                | +105.994 | +106.001 |
| Fiducial center                  | 0.000    | 0.000    |
| Principal point symmetry         | -0.013   | +0.008   |
| Principal point auto collimation | +0.012   | -0.006   |

**Figure S2.** Fiducial mark type and it's orientation of Wild RC 10 camera, UAG II 3045 used to acquire the 1984 historical aerial photographs.

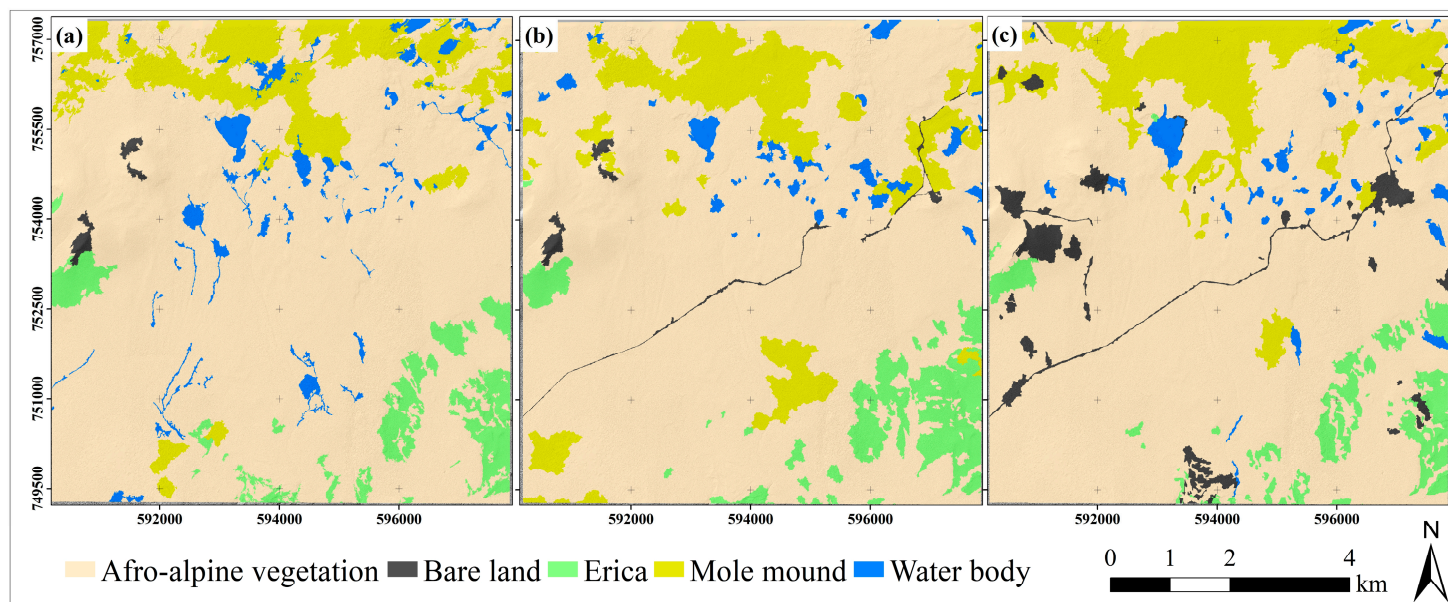

**Figure S3.** Land use land cover map developed from reconstructed orthomosaics of the year 1967 (a) and 1984 (b) and from RapidEye 5m multispectral satellite imagery for the year 2023 (c) using ArcMap 10.8.2. Maximum Likelihood Classification algorithm was used to classify the images in to five major land cover classes as described below in the table (Table S5). (Source for RapidEye is from (Tyc et al. 2005) [76]).

**Table S5.** Description of Land use land covers and its areal coverage in 1967, 1984 and 2023 in Hectares (ha)

| Land use<br>land cover    | Description                                                                                                                                                                                   | Year      |        |        |
|---------------------------|-----------------------------------------------------------------------------------------------------------------------------------------------------------------------------------------------|-----------|--------|--------|
|                           |                                                                                                                                                                                               | 1967      | 1984   | 2023   |
|                           |                                                                                                                                                                                               | Area (ha) |        |        |
| Afro-alpine<br>vegetation | Included species of Helichrysum (H. splendidum, H. citrispinum, H. cymosum, H. jormosissimum), species of Alchemilla, Festuca abyssinica, Grass lands, Artemisia, and Lobelia rhynchopetalum. | 4967.6    | 4866.8 | 4814.2 |
| Bare land                 | Included rocks, roads and excavated areas                                                                                                                                                     | 27.2      | 50.7   | 217.7  |
| Erica                     | Included both Erica trimera and Erica Arboria.                                                                                                                                                | 344.5     | 396.5  | 278.8  |
| Mole Mound                | exposed landscape created by giant root rat                                                                                                                                                   | 648.4     | 759.6  | 744.1  |
| Water Body                | Included alpine lakes, rivers and wetlands                                                                                                                                                    | 206.3     | 120.4  | 139.2  |

## Reference

76. Tyc, G.; Tulip, J.; Schulten, D.; Krischke, M.; Oxfort, M. The RapidEye Mission Design. *Acta Astronautica* **2005**, *56*, 213–219, doi:10.1016/j.actaastro.2004.09.029.
